# Supplementary material for: In vivo cloning of PCR product via site-specific recombination in Escherichia coli
Source: Springer Nature journal article supplement (doi:10.1007/s00253-024-13239-7), 2024-06-29
Supplement: MOESM1 [file 253_2024_13239_MOESM1_ESM.pdf]

## **Supporting Information**

### **Applied Microbiology and Biotechnology**

# **In vivo Cloning of PCR Product via Site-Specific Recombination in *Escherichia coli***

Moein Aliakbari<sup>1</sup>, Ali Asghar Karkhane<sup>1\*</sup>

<sup>1</sup> Department of Industrial and Environmental Biotechnology, National Institute of Genetic Engineering and Biotechnology (NIGEB), Tehran, Iran

\* Corresponding author

E-mail: karkhane@nigeb.ac.ir





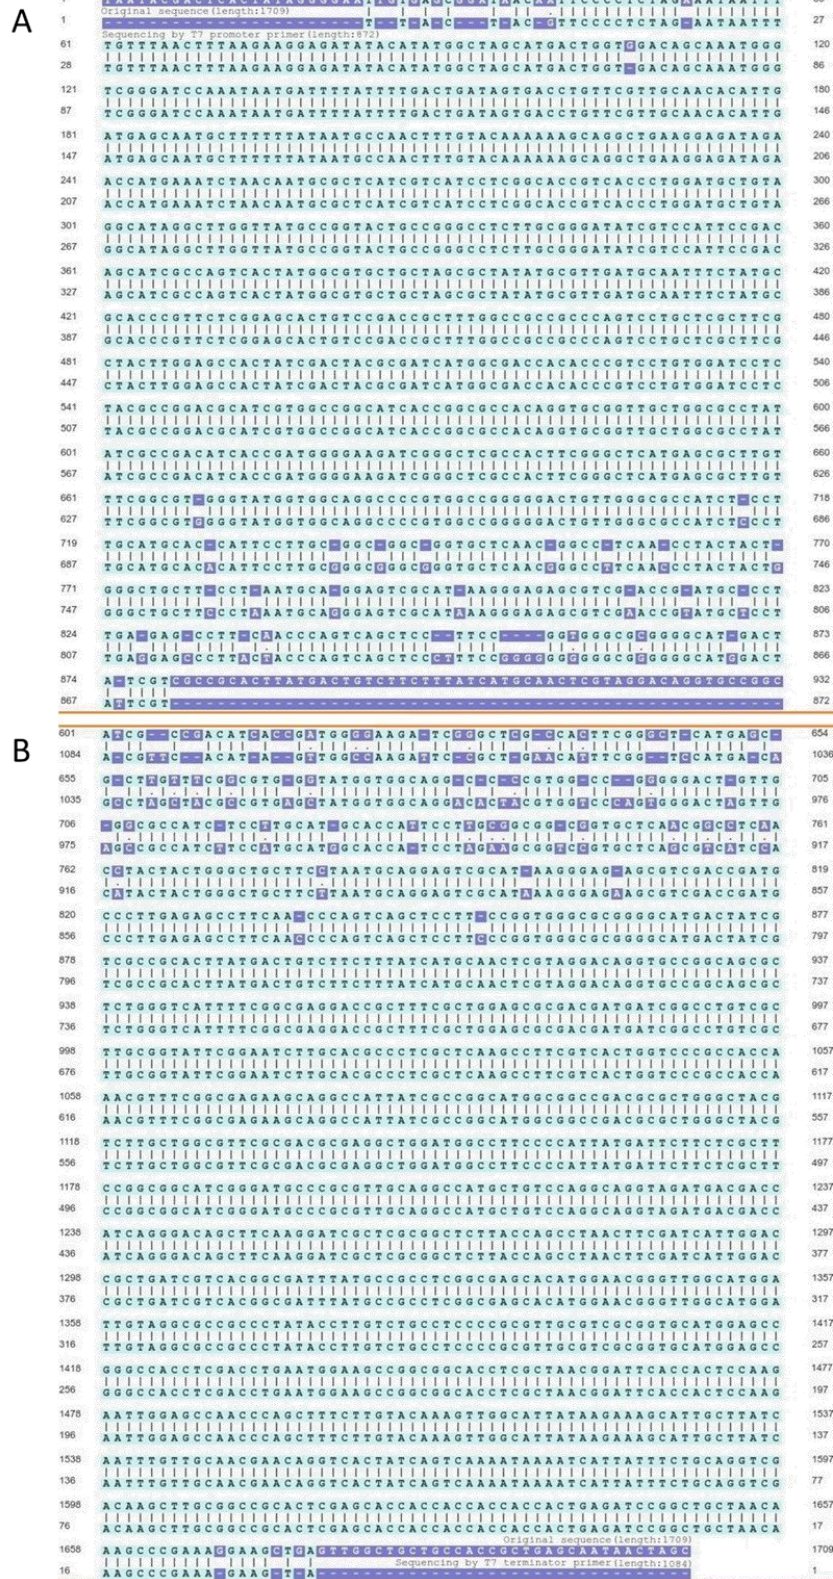

**Fig S2.** The alignment of sequencing data with the sequence of the *tetA* gene (flanked by *attL* sites). (A) The correct direction of the insert fragment was confirmed by alignment with sequencing data related to the T7 promoter and (B) T7 terminator primers.
